# Supplementary material for: The Aβ(1–38) peptide is a negative regulator of the Aβ(1–42) peptide implicated in Alzheimer disease progression
Source: PubMed Central journal article supplement (PMC7801637; doi:10.1038/s41598-020-80164-w), 2021-01-11
Supplement: 41598_2020_80164_MOESM1_ESM.pdf [file 41598_2020_80164_MOESM1_ESM.pdf]

# **The A $\beta$ (1-38) peptide is a negative regulator of the A $\beta$ (1-42) peptide implicated in Alzheimer disease progression**

Maa O. Quartey<sup>1</sup>, Jennifer N. K. Nyarko<sup>1</sup>, Jason M. Maley<sup>2</sup>, Jocelyn R. Barnes<sup>3</sup>, Maria A. C. Bolanos<sup>4</sup>, Ryan M. Heistad<sup>1</sup>, Kaeli J. Knudsen<sup>1</sup>, Paul R. Pennington<sup>1</sup>, Josef Buttigieg<sup>4</sup>, Carlos E. De Carvalho<sup>5</sup>, Scot C. Leary<sup>6</sup>, Matthew P. Parsons<sup>3</sup>, Darrell D. Mousseau<sup>1,\*</sup>

<sup>1</sup>: Cell Signalling Laboratory, Department of Psychiatry, University of Saskatchewan, Saskatoon, SK, Canada;

<sup>2</sup>: Saskatchewan Structural Sciences Centre, University of Saskatchewan, Saskatoon, SK, Canada;

<sup>3</sup>: Division of BioMedical Sciences (Neurosciences), Memorial University of Newfoundland, St. John's, NL, Canada;

<sup>4</sup>: Department of Biology, University of Regina, Regina, SK, Canada;

<sup>5</sup>: Department of Biology, University of Saskatchewan, Saskatoon, SK, Canada;

<sup>6</sup>: Department of Biochemistry, Microbiology and Immunology, University of Saskatchewan, Saskatoon, SK, Canada.

\*Address correspondence to: D.D. Mousseau, Cell Signalling Laboratory, GB41 HSB, University of Saskatchewan, 107 Wiggins Rd., Saskatoon, SK (S7N 5E5), Canada.

e-mail: [darrell.mousseau@usask.ca](mailto:darrell.mousseau@usask.ca)

Running title: A $\beta$ 38 is a negative regulator of A $\beta$ 42

**List of supplementary figures (uncropped Western blots)**

**Supplementary Figure 1. A scan of three blots used for our A $\beta$  peptide co-incubation experiment (cropped and used for Figure 2).**

**Supplementary Figure 2. A scan of a blot used to identify A $\beta$  peptides in *C. elegans* extracts (one light; one overexposed to see the putative A $\beta$ (1-38) dimer).**

**Supplementary Figure 3. A representative full-length blot depicting soluble A $\beta$  peptides isolated from the RIPA fraction of human cortical brain samples (cropped for Figure 7).**

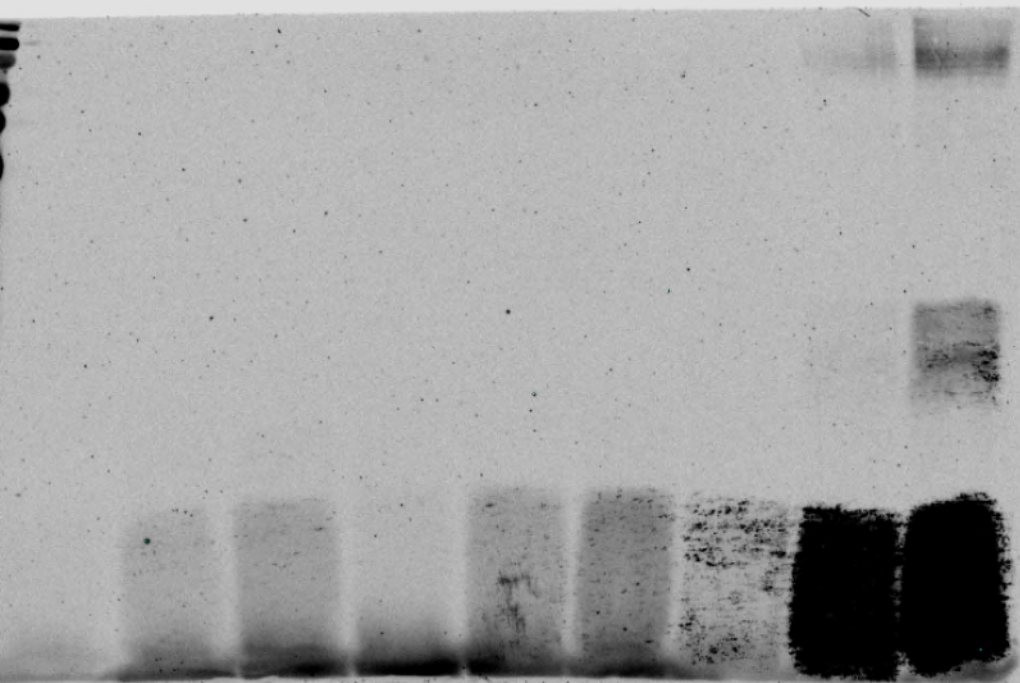

Co-Extraction SDS PAGE RM Oct. 6, 2020 1

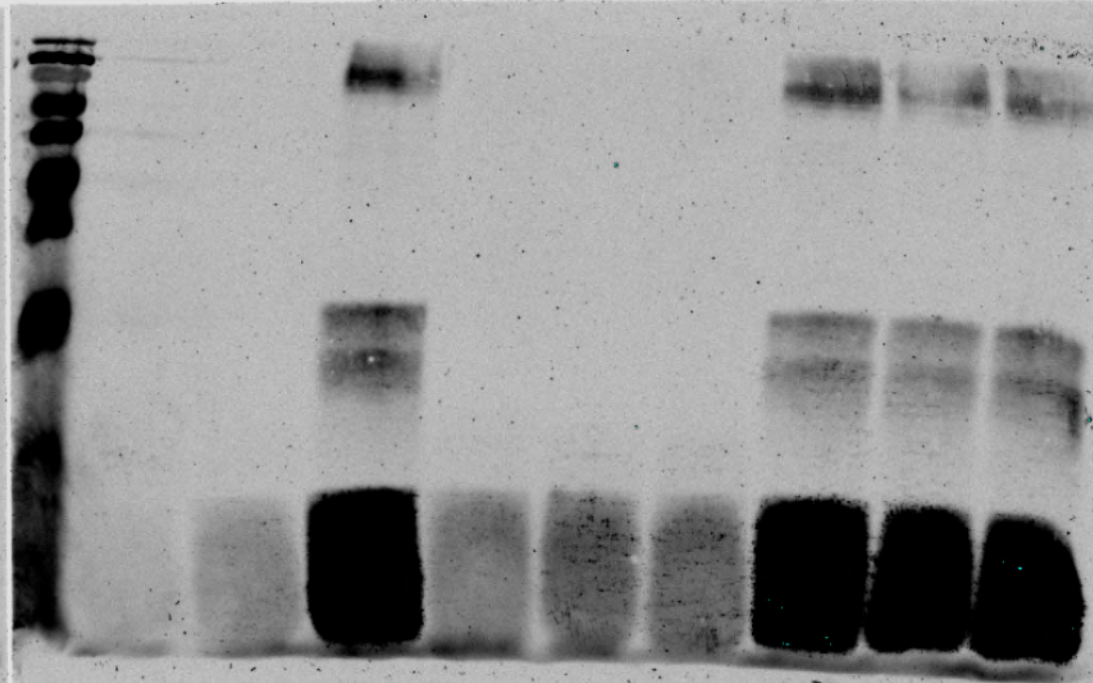

AB Co-Extraction SDS PAGE RM Oct. 6, 2020

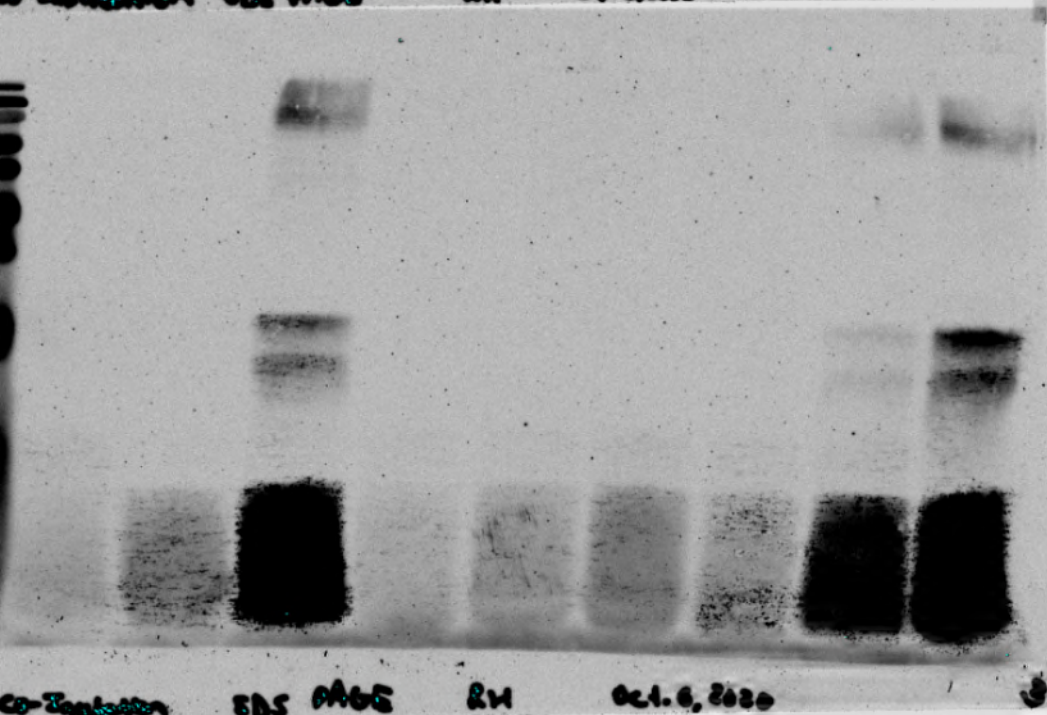

Co-Extraction SDS PAGE RM Oct. 6, 2020 3

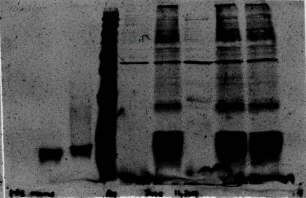

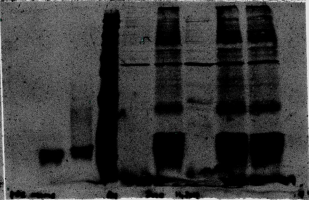

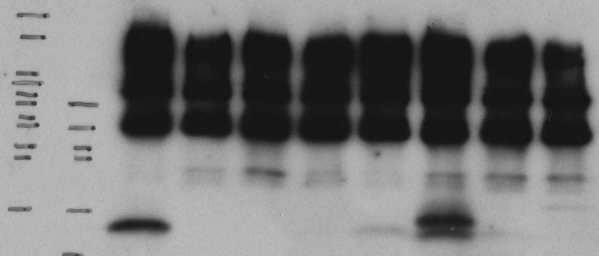

18-MALE

5 24 28 34 33 27 22 31  
 ← CTL → ← FAD → ← LOAD →

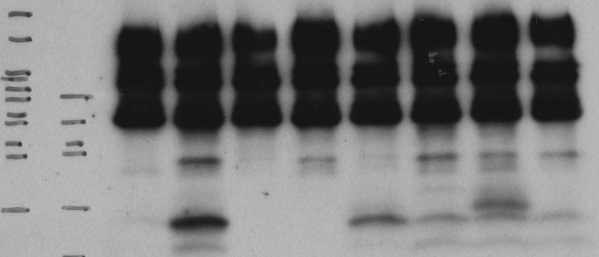

28-FEMALE

9 29 26 7 23 21 30 36  
 ← CTL → ← FAD → ← LOAD →

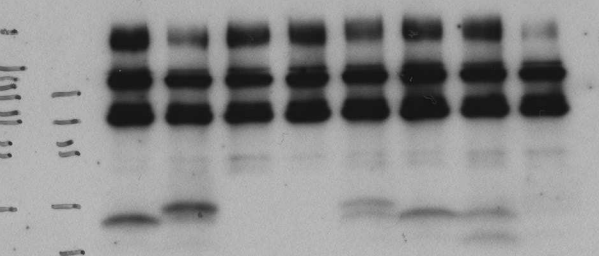

38-FIX

10 35 8 32 20 16 37 25  
 n n F F F F F F  
 ← LOADn → ← CTL → ← FAD → ← LOAD → FAD

51
